# Supplementary material
Source: PubMed Central journal article supplement (PMC4148866)
Supplement: supp_M114.553883_jbc.M114.553883-1.pdf [file supp_M114.553883_jbc.M114.553883-1.pdf]

## VIDEO LEGENDS

Video1 shows filopodial dynamics of N1E-115 cells transfected with cDNA encoding for mCherry-lifect and GFP using time-lapse microscopy.

Video2 shows filopodial dynamics of N1E-115 cells transfected with cDNA encoding for mCherry-lifect and GFP-IRSp53 using time-lapse microscopy.

Video3 shows filopodial dynamics of N1E-115 cells transfected with cDNA encoding for mCherry-lifect and Dyn1-GFP using time-lapse microscopy.

Video4 shows filopodial dynamics of N1E-115 cells transfected with cDNA encoding for mCherry-lifect and GFP-Mena using time-lapse microscopy.

Video5 shows persistent filopodia and increased filopodial lifetime of N1E-115 cells over-expressing mCherry-lifect and GFP-Mena using time-lapse microscopy.

Video6 shows filopodial dynamics of N1E-115 cells transfected with cDNA encoding for mCherry-lifect and GFP-Eps8 using time-lapse microscopy.
